# Supplementary material for: Comparisons of Combined Oxidant Capacity and Redox-Weighted Oxidant Capacity in Their Association with Increasing Levels of COVID-19 Infection
Source: MDPI journal article supplement (doi:10.3390/atmos13040569), 2022-04-01
Supplement: s1 [file s1]

## Supplement Information

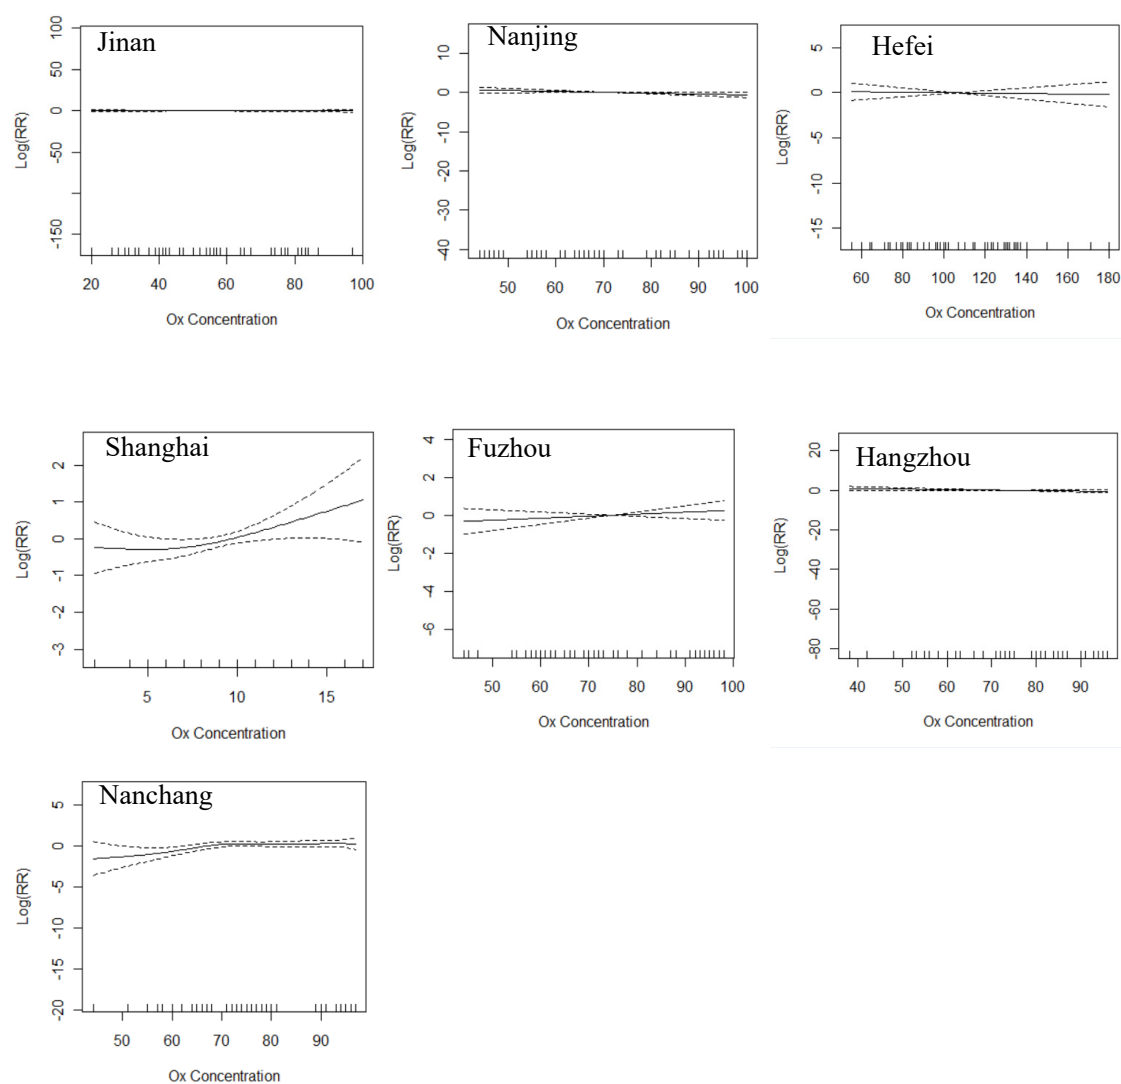

**Figure S1.**  $\text{O}_x$  values in eastern China.

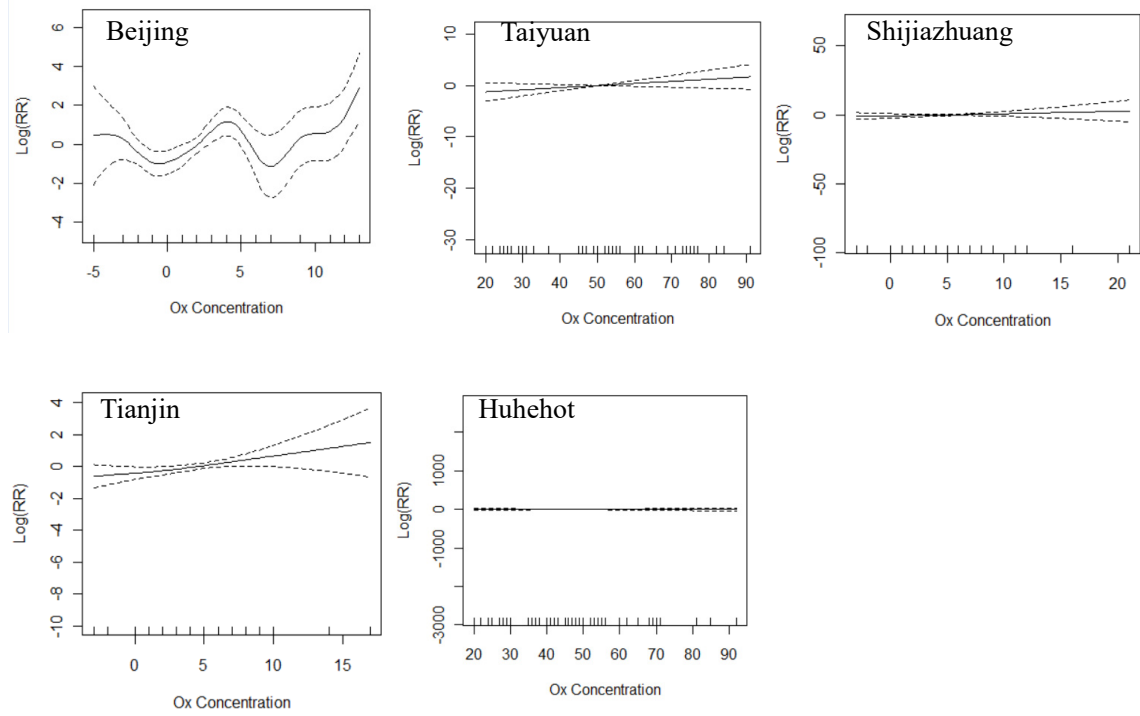

**Figure S2.**  $O_x$  values in Northern China.

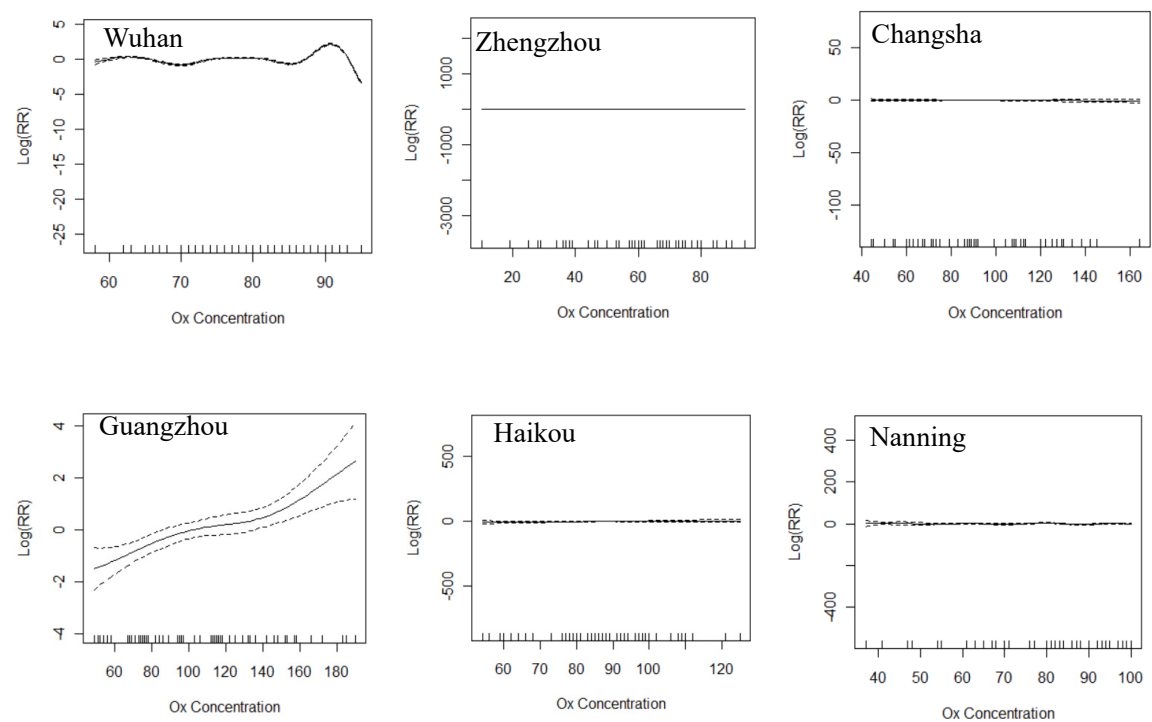

**Figure S3.**  $O_x$  value in southern China.

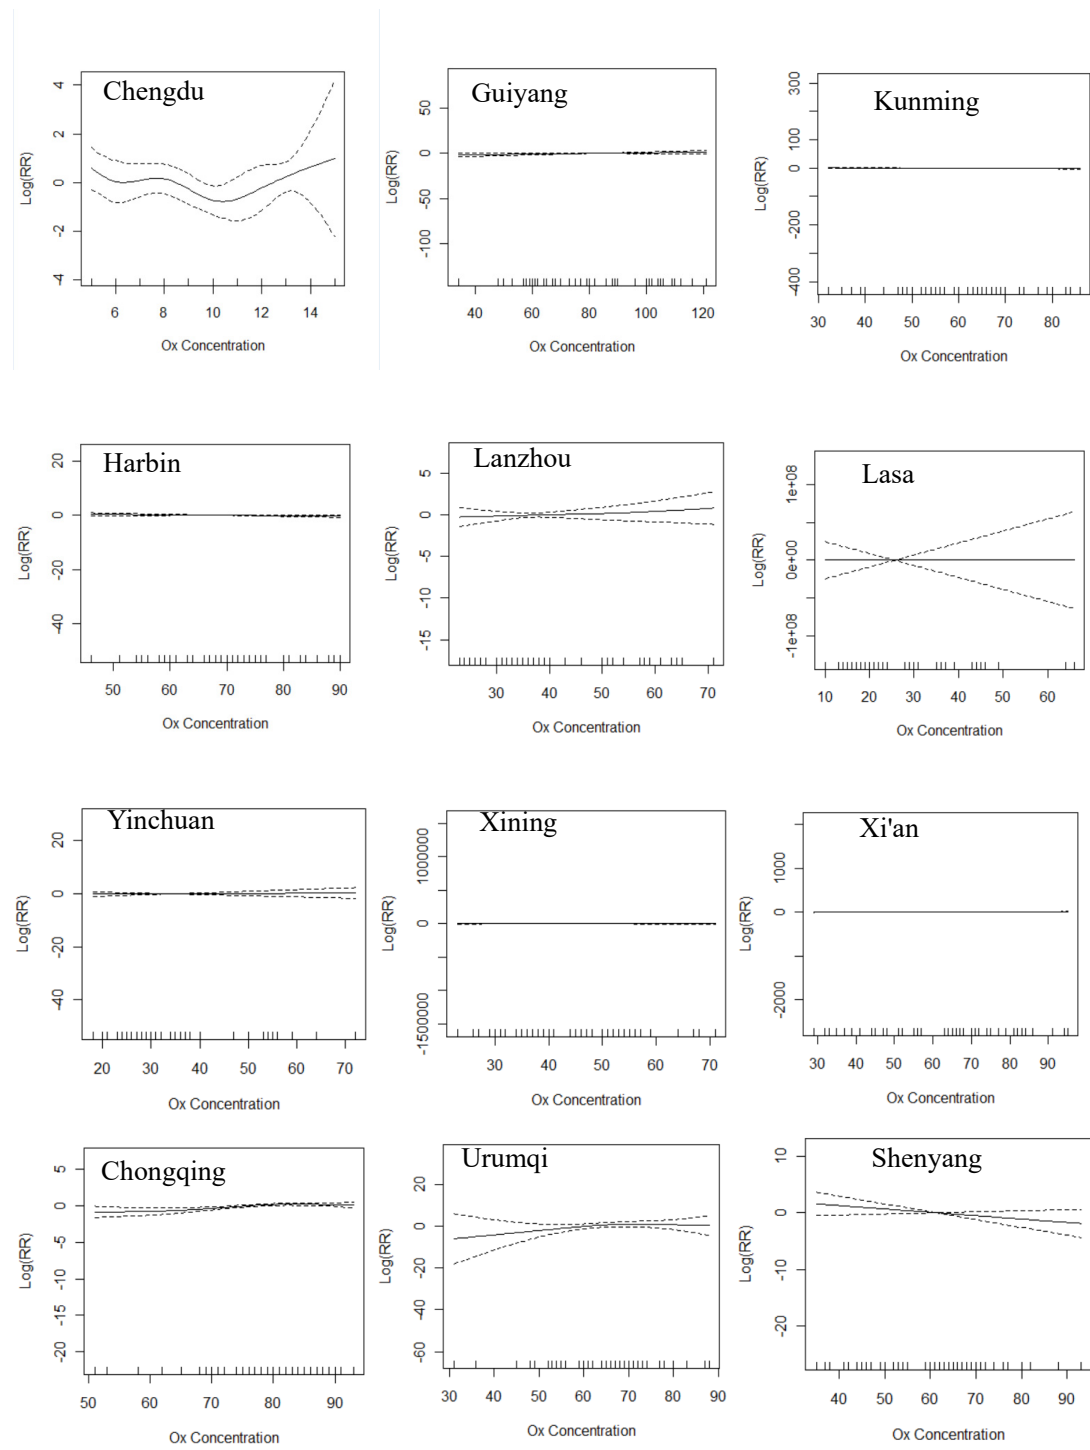

**Figure S4.**  $O_x$  values in other cities of China.

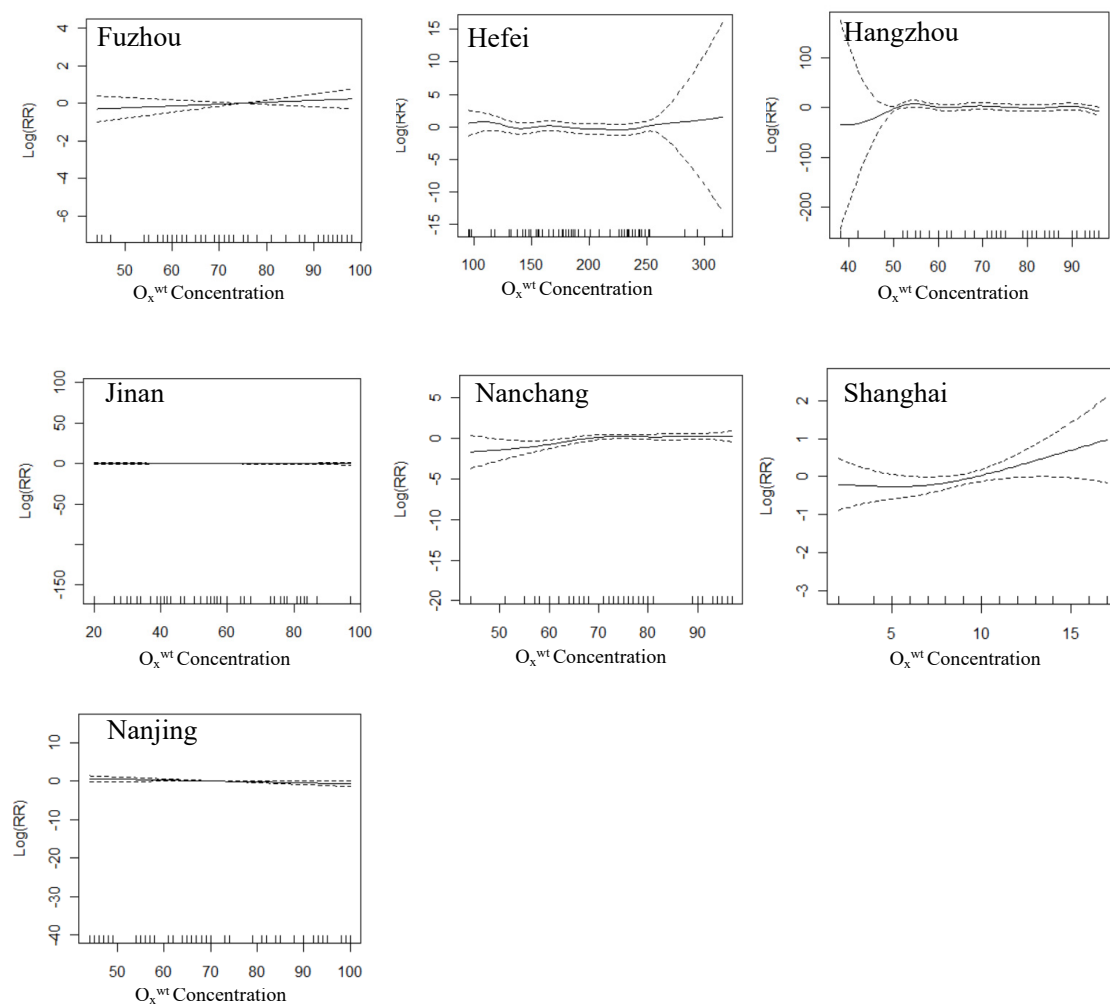

**Figure S5.**  $O_x^{wt}$  values in eastern China.

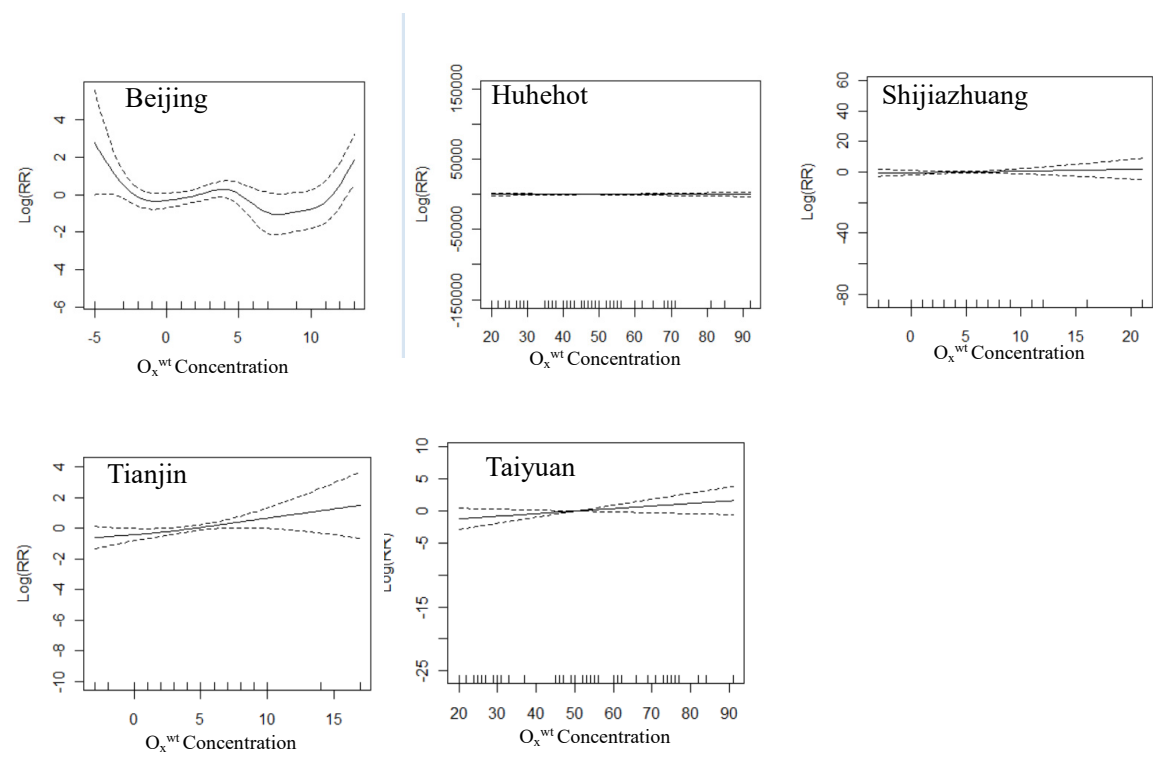

**Figure S6.**  $O_x^{wt}$  values in northern China.

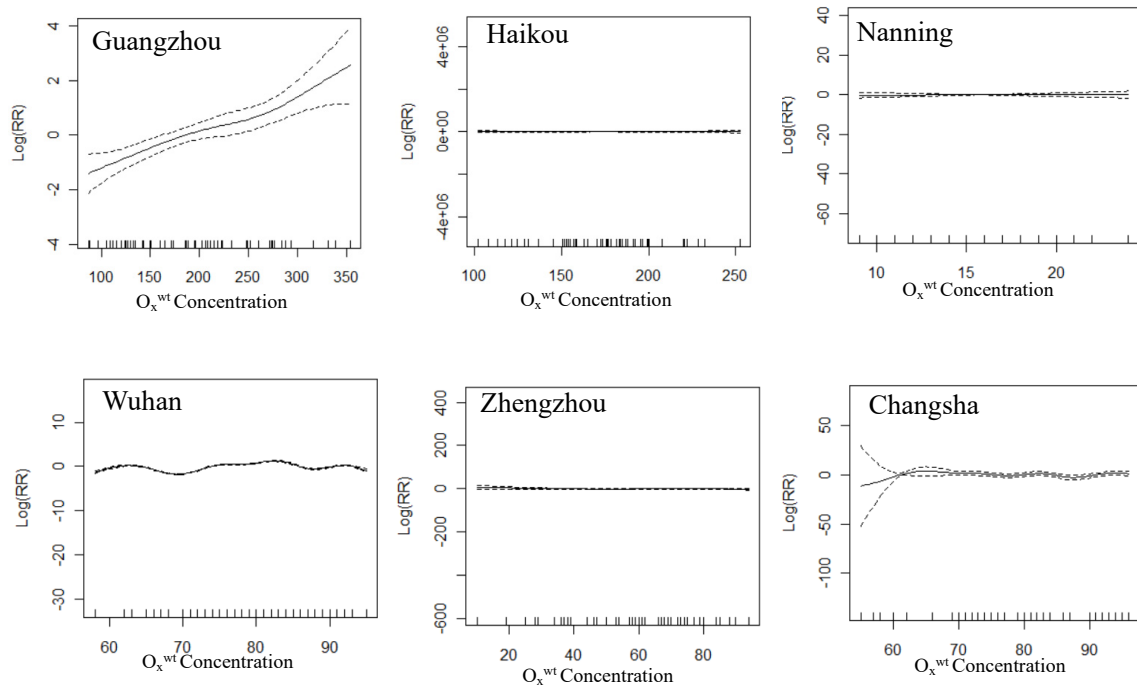

**Figure S7.**  $\text{O}_x^{\text{wt}}$  values in southern China.

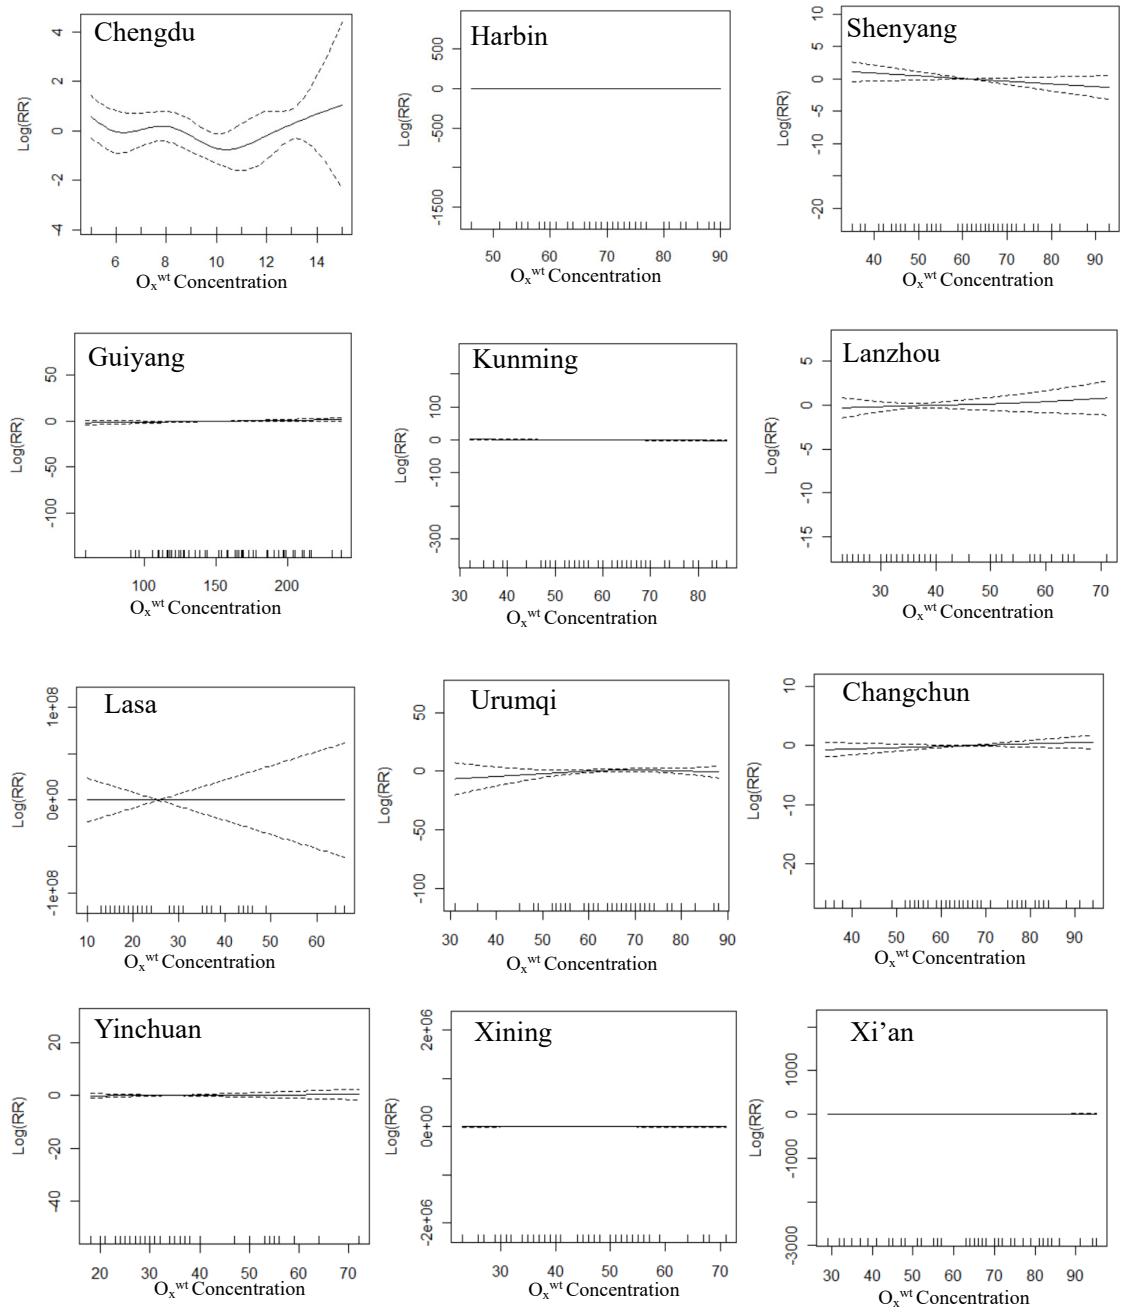

**Figure S8.** O<sub>x</sub><sup>wt</sup> values in other cities of China.

**Table S1.** Lag effect for China cities.

|          |      | O <sub>3</sub>  | NO <sub>2</sub> | O <sub>x</sub>   | O <sub>x</sub> <sup>wt</sup> |
|----------|------|-----------------|-----------------|------------------|------------------------------|
| Beijing  | Lag1 | 7.9%[-2.2%,19%] | ##              | 1.1%[-7.4%,10%]  | 2%[-2.6%,7%]                 |
|          | Lag2 | 2.3%[-6.5%,12%] | ##              | 0.2%[-6.8%,7.9%] | 0.5%[-3.4%,4.7%]             |
|          | Lag3 | 1.9%[-6.5%,11%] | ##              | 0.2%[-6%,6.8%]   | 0.4%[-3.2%,4.1%]             |
|          | Lag4 | 7.1%[-4%,19%]   | ##              | 3.1%[-5.5%,12%]  | 2.5%[-2.4%,7.7%]             |
|          | Lag5 | 4.4%[-6.2%,16%] | 6.8%[-6.4%,22%] | 4.4%[-2%,12%]    | 2.4%[-1.9%,6.9%]             |
|          | Lag6 | ##              | 4.4%[-8.1%,18%] | ##               | ##                           |
|          | Lag7 | 4.2%[-6.5%,16%] | 16%[2.2%,32%]   | 7.3%[-0.1%, 15%] | 3.4%[-0.9%,8%]               |
| Tianjin  | Lag1 | ##              | 5.1%[-13%,27%]  | 0.05%[-12%,13%]  | 0.2%[-11%,13%]               |
|          | Lag2 | ##              | ##              | ##               | ##                           |
|          | Lag3 | 22%[-4.6%,56%]  | ##              | 0.3%[-9%,10%]    | 0.07%[-8.9%,10%]             |
|          | Lag4 | ##              | ##              | ##               | ##                           |
|          | Lag5 | 4.8%[15%,29%]   | ##              | ##               | ##                           |
|          | Lag6 | 14%[10%,47%]    | 2.8%[-15%,25%]  | 5.6%[-7.8%,21%]  | 5.2%[-7.6%,20%]              |
|          | Lag7 | ##              | 5.7%[-11%,26%]  | 1.9%[-10%,16%]   | 1.9%[-10%,16%]               |
| Shanghai | Lag1 | ##              | 0.5%[-15%,19%]  | ##               | ##                           |
|          | Lag2 | 4.1%[-5.1%,14%] | 9.7%[-7%,30%]   | 5.9%[-2%,15%]    | 2.5%[-1%,7%]                 |
|          | Lag3 | 2.8%[-7.1%,13%] | 15%[-2%,36%]    | 7%[-2%,17%]      | 2.7%[-2%,7%]                 |
|          | Lag4 | ##              | 11%[-6%,33%]    | 0.8%[-8%,10%]    | ##                           |
|          | Lag5 | 4.1%[-5.8%,15%] | 4%[-14%,27%]    | 3.5%[-5%,13%]    | 1.9%[-2%,6%]                 |
|          | Lag6 | 6.9%[-3.1%,18%] | ##              | 4.3%[-5%,14%]    | 2.7%[-2%,7%]                 |
|          | Lag7 | ##              | 2.5%[-17%,26%]  | ##               | ##                           |
| Chonqing | Lag1 | ##              | 6%[-16%,34%]    | 0.6%[-7%,9%]     | 0.1%[-3%,4%]                 |
|          | Lag2 | ##              | ##              | ##               | ##                           |
|          | Lag3 | ##              | 39%[7%,81%]     | ##               | ##                           |
|          | Lag4 | 9%[-1%,20%]     | 1.9[-20%,31%]   | 6%[-2%,17%]      | 3%[-1%,8%]                   |
|          | Lag5 | ##              | ##              | ##               | ##                           |
|          | Lag6 | 7%[-2%,18%]     | 23%[-19%,90%]   | 6%[-3%,17%]      | 3%[-1%,8%]                   |
|          | Lag7 | 11%[1%,21%]     | 13%[-17%,57%]   | 8%[-0.5%,17%]    | 4%[0.2%,9%]                  |
| Shenyang | Lag1 | 12%[-18%,55%]   | ##              | 2.8%[-25%,41%]   | ##                           |
|          | Lag2 | 6%[-24%,51%]    | ##              | 3.4%[-23%,39%]   | 2.9%[-13%,21%]               |
|          | Lag3 | 38%[-5%,104%]   | ##              | 15%[-13%,54%]    | 17%[-2.9%,41%]               |
|          | Lag4 | ##              | 12%[-22%,62%]   | ##               | ##                           |
|          | Lag5 | ##              | 20%[-18%,78%]   | 1.1%[-27%,40%]   | ##                           |
|          | Lag6 | ##              | ##              | ##               | ##                           |
|          | Lag7 | 3%[-43%,89%]    | ##              | ##               | ##                           |
| Harbin   | Lag1 | 13%[-7.4%,38%]  | ##              | ##               | ##                           |
|          | Lag2 | 1.8%[-12%,18%]  | 29%[7%,57%]     | 5.3%[-5%,16%]    | 2.2%[-3%,8%]                 |
|          | Lag3 | ##              | 16%[-0.4%,36%]  | 4.4%[-5%,14%]    | 1.2%[-4%,7%]                 |
|          | Lag4 | 15%[-4.5%,38%]  | ##              | 2.3%[-9%,15%]    | 1.6%[-4%,8%]                 |
|          | Lag5 | 5.6%[-11%,25%]  | ##              | 0.9%[-8%,11%]    | 1.1%[-4%,7%]                 |

|              |      |                 |                 |                |                 |
|--------------|------|-----------------|-----------------|----------------|-----------------|
|              | Lag6 | ##              | ##              | ##             | ##              |
|              | Lag7 | ##              | ##              | ##             | ##              |
|              | Lag1 | ##              | ##              | 107%[28%,234%] | 43%[1.6%,103%]  |
|              | Lag2 | ##              | ##              | ##             | ##              |
|              | Lag3 | ##              | ##              | ##             | 18%[-67%,339%]  |
| Changchun    | Lag4 | 32%[-28%,144%]  | ##              | ##             | 16%[-13%,58%]   |
|              | Lag5 | ##              | ##              | ##             | ##              |
|              | Lag6 | ##              | ##              | ##             | ##              |
|              | Lag7 | ##              | ##              | ##             | ##              |
|              | Lag1 | ##              | 21%[-34%,125%]  | ##             | ##              |
|              | Lag2 | ##              | ##              | ##             | ##              |
|              | Lag3 | ##              | 11%[-35%,94%]   | ##             | ##              |
| Shijiazhuang | Lag4 | 75%[-2.6%,216%] | ##              | ##             | 0.7%[-14%,18%]  |
|              | Lag5 | 81%[-7.6%,257%] | ##              | 45%[-19%,164%] | 29%[-7.4%,81%]  |
|              | Lag6 | 18%[-30%,101%]  | ##              | ##             | 2.2%[-17%,26%]  |
|              | Lag7 | ##              | ##              | ##             | ##              |
|              | Lag1 | ##              | 11%[-43%,120%]  | ##             | ##              |
|              | Lag2 | 21%[-9.2%,65%]  | ##              | 11%[-16%,49%]  | 7.9%[-6.4%,24%] |
|              | Lag3 | ##              | 10%[-45%,122%]  | 0.6%[-23%,32%] | ##              |
| Jinan        | Lag4 | ##              | 22%[-47%,186%]  | ##             | ##              |
|              | Lag5 | ##              | 32%[-38%,188%]  | ##             | ##              |
|              | Lag6 | 17%[-12%,57%]   | ##              | 17%[-13%,59%]  | 8.4%[-6.4%,25%] |
|              | Lag7 | ##              | ##              | ##             | ##              |
|              | Lag1 | ##              | ##              | ##             | ##              |
|              | Lag2 | ##              | ##              | ##             | ##              |
|              | Lag3 | 10%[-10%,36%]   | ##              | 1.5%[-14%,20%] | 2.7%[-6%,12%]   |
| Nanjing      | Lag4 | ##              | ##              | ##             | ##              |
|              | Lag5 | ##              | ##              | ##             | ##              |
|              | Lag6 | 7.3%[-13%,33%]  | 0.06%[-38%,62%] | 5.7%[-12%,28%] | 3.2%[-6.5%,14%] |
|              | Lag7 | ##              | 34%[-13%,108%]  | 4.7%[-14%,28%] | 0.7%[-9%,12%]   |
|              | Lag1 | 40%[8%,82%]     | ##              | 45%[-9%,93%]   | 18%[4%,35%]     |
|              | Lag2 | ##              | ##              | ##             | ##              |
|              | Lag3 | 2.9%[-24%,39%]  | ##              | 2.7%[-23%,37%] | 1.3%[-12%,17%]  |
| Hangzhou     | Lag4 | 3.4%[-10%,20%]  | ##              | ##             | 1%[-6%,8%]      |
|              | Lag5 | 25%[3%,51%]     | 72%[-58%,628%]  | 29%[5%,59%]    | 12%[2%,23%]     |
|              | Lag6 | 3.4%[-11%,20%]. | 13%[-62%,244%]  | 4.5%[-11%,23%] | 1.8%[-5%,10%]   |
|              | Lag7 | 4%[-20%,35%]    | ##              | 4.2%[-20%,37%] | 1.9%[-10%,16%]  |
|              | Lag1 | ##              | ##              | ##             | ##              |
|              | Lag2 | 6.8%[-5%,21%]   | 2.3%[-46%,95%]  | 7.6%[-5%,22%]  | 3.4%[-2%,10%]   |
| Fuzhou       | Lag3 | 1.6%[-12%,18%]  | ##              | 1.2%[-15%,21%] | 0.7%[-7%,9%]    |
|              | Lag4 | ##              | 1.6%[-36%,63%]  | ##             | ##              |
|              | Lag5 | ##              | ##              | ##             | ##              |
|              | Lag6 | 1.4%[-13%,19%]  | 1.8%[-41%,76%]  | 1.2%[-12%,17%] | 0.6%[-6%,8%]    |

|           |      |                |                 |                 |                |
|-----------|------|----------------|-----------------|-----------------|----------------|
| Zhengzhou | Lag7 | 3.5%[-11%,21%] | ##              | 0.5%[-13%,16%]  | 0.9%[-6%,8%]   |
|           | Lag1 | ##             | ##              | ##              | ##             |
|           | Lag2 | 48%[9%,101%]   | ##              | 11%[-12%,40%]   | 12%[-1.5%,28%] |
|           | Lag3 | ##             | ##              | ##              | ##             |
|           | Lag4 | 14%[0.5%,30%]  | ##              | 3%[-8%,17%]     | 3.8%[-2%,10%]  |
|           | Lag5 | ##             | 56%[26%,93%]    | 1.7%[-10%,15%]  | ##             |
|           | Lag6 | ##             | 6%[-19%,41%]    | ##              | ##             |
| Wuhan     | Lag7 | ##             | ##              | ##              | ##             |
|           | Lag1 | 8%[-6%,10%]    | ##              | ##              | ##             |
|           | Lag2 | ##             | 257%[244%,271%] | ##              | ##             |
|           | Lag3 | 46%[45%,48%]   | 191%[180%,202%] | 34%[33%,36%]    | 17%[17%,18%]   |
|           | Lag4 | 35%[34%,37%]   | 445%[423%,468%] | 39%[37%,40%]    | 17%[16%,17%]   |
|           | Lag5 | ##             | 25%[19%,31%]    | 1%[0.1%,3%]     | 0.3%[-0.6%,1%] |
|           | Lag6 | ##             | ##              | ##              | ##             |
| Changsha  | Lag7 | ##             | ##              | ##              | ##             |
|           | Lag1 | ##             | ##              | ##              | ##             |
|           | Lag2 | 23%[-1%,55%]   | ##              | 21%[-3%,52%]    | 10%[-1%,23%]   |
|           | Lag3 | 2%[-9%,15%]    | ##              | 0.06%[-10%,11%] | 0.5%[-4%,6%]   |
|           | Lag4 | ##             | ##              | ##              | 0.4%[-9%,11%]  |
|           | Lag5 | ##             | ##              | ##              | ##             |
|           | Lag6 | ##             | ##              | ##              | ##             |
| Hefei     | Lag7 | ##             | ##              | ##              | ##             |
|           | Lag1 | ##             | ##              | ##              | ##             |
|           | Lag2 | ##             | 24%[-22%,101%]  | ##              | ##             |
|           | Lag3 | 6%[-9%,24%]    | ##              | 0.9%[-10%,13%]  | 1%[-5%,8%]     |
|           | Lag4 | 25%[7%,47%]    | 20%[-23%,91%]   | 25%[9%,45%]     | 12%[4%,20%]    |
|           | Lag5 | ##             | ##              | ##              | ##             |
|           | Lag6 | ##             | ##              | ##              | ##             |
| Guangzhou | Lag7 | 4%[-9%,19%]    | 31%[-22%,123%]  | 5%[-6%,18%]     | 2%[-3%,9%]     |
|           | Lag1 | ##             | 10%[-25%,63%]   | ##              | ##             |
|           | Lag2 | ##             | ##              | ##              | ##             |
|           | Lag3 | 1%[-10%,14%]   | 16%[-11%,52%]   | 3%[-7%,16%]     | 1%[-4%,7%]     |
|           | Lag4 | ##             | ##              | ##              | ##             |
|           | Lag5 | 3%[-8%,17%]    | ##              | ##              | 0.3%[-5%,6%]   |
|           | Lag6 | ##             | ##              | ##              | ##             |
| Nanning   | Lag7 | ##             | ##              | ##              | ##             |
|           | Lag1 | ##             | ##              | ##              | ##             |
|           | Lag2 | 15%[-9%,46%]   | ##              | ##              | 4%[-5%,16%]    |
|           | Lag3 | 20%[-4%,52%]   | ##              | 13%[-6%,38%]    | 7%[-2%,19%]    |
|           | Lag4 | ##             | 48%[-41%,276%]  | ##              | ##             |
|           | Lag5 | ##             | ##              | ##              | ##             |
|           | Lag6 | 33%[0%,79%]    | ##              | 32%[-1%,78%]    | 14%[-0.2%,32%] |
|           | Lag7 | ##             | ##              | ##              | ##             |

|          |      |                |                 |                |                |
|----------|------|----------------|-----------------|----------------|----------------|
| Lanzhou  | Lag1 | 16%[-15%,59%]  | ##              | 4%[-14%,27%]   | 4%[-7%,17%]    |
|          | Lag2 | 26%[-7%,71%]   | ##              | 7%[-12%,32%]   | 6%[-5%,20%]    |
|          | Lag3 | 26%[-7%,72%]   | ##              | 9%[-11%,34%]   | 7%[-5%,21%]    |
|          | Lag4 | 0.2%[-28%,40%] | 31%[-17%,110%]  | 6%[-14%,33%]   | 2%[-10%,17%]   |
|          | Lag5 | ##             | 16%[-28%,89%]   | ##             | ##             |
|          | Lag6 | 40%[-8%,116%]  | 49%[-19%,175%]  | 29%[-5%,76%]   | 15%[-2%,38%]   |
|          | Lag7 | ##             | ##              | ##             | ##             |
| Yinchuan | Lag1 | 28%[-6%,78%]   | 58%[-16%,200%]  | 24%[-3%,58%]   | 12%[-2%,28%]   |
|          | Lag2 | 3%[-22%,39%]   | ##              | 1%[-17%,23%]   | 1%[-10%,14%]   |
|          | Lag3 | 9%[-20%,50%]   | ##              | 2%[-16%,26%]   | 2%[-9%,16%]    |
|          | Lag4 | ##             | ##              | ##             | ##             |
|          | Lag5 | ##             | ##              | ##             | ##             |
|          | Lag6 | 27%[-15%,91%]  | 1%[-29%,44%]    | 8%[-13%,35%]   | 6%[-7%,23%]    |
|          | Lag7 | 10%[-22%,57%]  | ##              | 3%[-18%,31%]   | 3%[-10%,19%]   |
| Taiyuan  | Lag1 | 14%[-27%,78%]  | 42%[-25%,172%]  | 23%[-24%,100%] | ##             |
|          | Lag2 | ##             | ##              | ##             | ##             |
|          | Lag3 | ##             | 4%[-53%,135%]   | ##             | ##             |
|          | Lag4 | ##             | ##              | ##             | ##             |
|          | Lag5 | ##             | ##              | 32%[-49%,249%] | ##             |
|          | Lag6 | ##             | ##              | ##             | ##             |
|          | Lag7 | ##             | ##              | ##             | ##             |
| Huhehot  | Lag1 | ##             | ##              | ##             | ##             |
|          | Lag2 | ##             | ##              | ##             | ##             |
|          | Lag3 | ##             | ##              | ##             | ##             |
|          | Lag4 | ##             | ##              | ##             | -24%[-57%,33%] |
|          | Lag5 | ##             | ##              | ##             | ##             |
|          | Lag6 | ##             | ##              | ##             | ##             |
|          | Lag7 | ##             | ##              | ##             | ##             |
| Xi'an    | Lag1 | ##             | 127%[-32%,666%] | 5%[-18%,37%]   | ##             |
|          | Lag2 | ##             | ##              | ##             | ##             |
|          | Lag3 | 7%[-12%, -31%] | 65%[-46%,407%]  | 7%[-9%,28%]    | 3%[-5%,13%]    |
|          | Lag4 | 21%[-11%,65%]  | ##              | 18%[-9%,53%]   | 9%[-4%,25%]    |
|          | Lag5 | ##             | 10%[-14%,44%]   | ##             | ##]            |
|          | Lag6 | ##             | ##              | ##             | ##             |
|          | Lag7 | 12%[-17%,53%]  | ##              | 10%[-6%,30%]   | 6%[-2%,16%]    |
| Urumqi   | Lag1 | ##             | 5%[-46%,108%]   | ##             | ##             |
|          | Lag2 | 20%[-15%,72%]  | 37%[-30%,174%]  | 42%[-3%,109%]  | 15%[-4%,40%]   |
|          | Lag3 | 5%[-34%,70%]   | 36%[-33%,181%]  | 31%[-27%,137%] | 8%[-17%,42%]   |
|          | Lag4 | 5%[-38%,81%]   | ##              | ##             | ##             |
|          | Lag5 | ##             | ##              | ##             | ##             |
|          | Lag6 | ##             | 68%[-43%,404%]  | ##             | ##             |
|          | Lag7 | ##             | 57%[-30%,255%]  | ##             | ##             |

---

|         |      |               |                |                |                |
|---------|------|---------------|----------------|----------------|----------------|
|         | Lag1 | ##            | ##             | ##             | ##             |
|         | Lag2 | 116%[2%,359%] | ##             | 63%[-7%,190%]  | 35%[-1%,85%]   |
|         | Lag3 | ##            | ##             | 182%[5%,655%]  | 70%[2%,185%]   |
| Xining  | Lag4 | ##            | ##             | ##             | ##             |
|         | Lag5 | ##            | ##             | ##             | ##             |
|         | Lag6 | 32%[-4%,84%]  | ##             | 28%[-5%,74%]   | 13%[-2%,32%]   |
|         | Lag7 | ##            | ##             | ##             | ##             |
|         | Lag1 | ##            | ##             | ##             | ##             |
|         | Lag2 | ##            | ##             | ##             | ##             |
|         | Lag3 | ##            | ##             | ##             | ##             |
| Lasa    | Lag4 | ##            | ##             | ##             | ##             |
|         | Lag5 | ##            | ##             | ##             | ##             |
|         | Lag6 | ##            | ##             | ##             | ##             |
|         | Lag7 | ##            | ##             | ##             | ##             |
|         | Lag1 | 4%[-7%,17%]   | ##             | 6%[-7%,22%]    | 2%[-3%,9%]     |
|         | Lag2 | ##            | ##             | ##             | ##             |
|         | Lag3 | ##            | ##             | 16%[-9%,50%]   | ##             |
| Chengdu | Lag4 | 17%[1%,35%]   | ##             | 13%[-4%,34%]   | 8%[0.3%,16%]   |
|         | Lag5 | ##            | ##             | ##             | ##             |
|         | Lag6 | ##            | 1%[-35%,61%]   | ##             | ##             |
|         | Lag7 | ##            | 15%[-32%,98%]  | ##             | ##             |
|         | Lag1 | ##            | ##             | ##             | ##             |
|         | Lag2 | 12%[-17%,53%] | ##             | 8%[-18%,44%]   | 4%[-9%,21%]    |
|         | Lag3 | ##            | ##             | ##             | ##             |
| Guiyang | Lag4 | ##            | 73%[-71%,965%] | 3%[-27%,49%]   | 0.6%[-16%,21%] |
|         | Lag5 | 31%[-11%,93%] | ##             | 24%[-12%,78%]  | 12%[-6%,34%]   |
|         | Lag6 | ##            | ##             | ##             | ##             |
|         | Lag7 | ##            | ##             | 31%[-16%,106%] | 15%[-8%,46%]   |
|         | Lag1 | ##            | ##             | ##             | ##             |
|         | Lag2 | ##            | ##             | ##             | ##             |
|         | Lag3 | ##            | ##             | ##             | ##             |
| Haikou  | Lag4 | ##            | ##             | ##             | ##             |
|         | Lag5 | ##            | ##             | ##             | ##             |
|         | Lag6 | ##            | ##             | ##             | ##             |
|         | Lag7 | 45%[-6%,126%] | ##             | ##             | 6%[-7%,21%]    |
|         | Lag1 | 33%[7%,66%]   | 13%[-82%,629%] | 29%[5%,59%]    | 14%[3%,26%]    |
|         | Lag2 | 26%[-3%,64%]  | ##             | 31%[1%,71%]    | 13%[-0.4%,28%] |
|         | Lag3 | ##            | ##             | ##             | ##             |
| Kunming | Lag4 | 32%[-6%,86%]  | ##             | 29%[-4%,76%]   | 11%[-8%,36%]   |
|         | Lag5 | 13%[-8%,42%]  | ##             | 12%[-8%,38%]   | 6%[-4%,17%]    |
|         | Lag6 | ##            | ##             | ##             | ##             |
|         | Lag7 | ##            | 76%[-57%,630%] | ##             | ##             |

---

|          |      |              |               |              |             |
|----------|------|--------------|---------------|--------------|-------------|
|          | Lag1 | ##           | ##            | ##           | ##          |
|          | Lag2 | ##           | ##            | ##           | ##          |
|          | Lag3 | ##           | ##            | ##           | ##          |
| Nanchang | Lag4 | 3%[-12%,20%] | 5%[-29%,56%]  | 2%[-9%,16%]  | 1%[-5%,8%]  |
|          | Lag5 | 11%[-3%,28%] | 27%[-18%,99%] | 12%[-3%,30%] | 6%[-1%,14%] |
|          | Lag6 | ##           | 8%[-27%,61%]  | ##           | ##          |
|          | Lag7 | ##           | 4%[-30%,55%]  | ##           | ##          |

---
